# Supplementary figures and images for: A comparative study of the cryo-EM structures of Saccharomyces cerevisiae and human anaphase-promoting complex/cyclosome (APC/C)
Source: eLife journal article supplement (doi:10.7554/elife.100821), 2024-08-15

Figure 1-figure supplement 1  
Source data 1

A

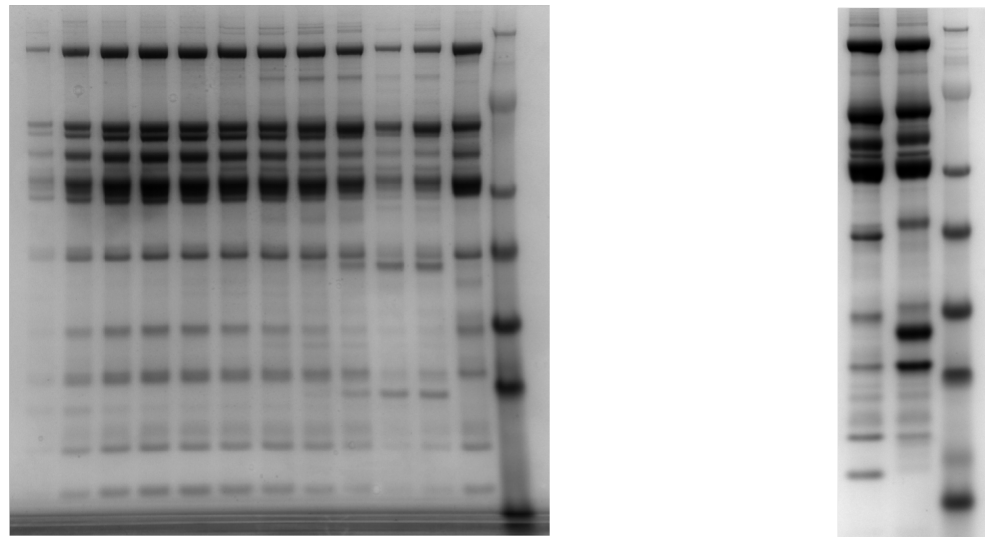

B

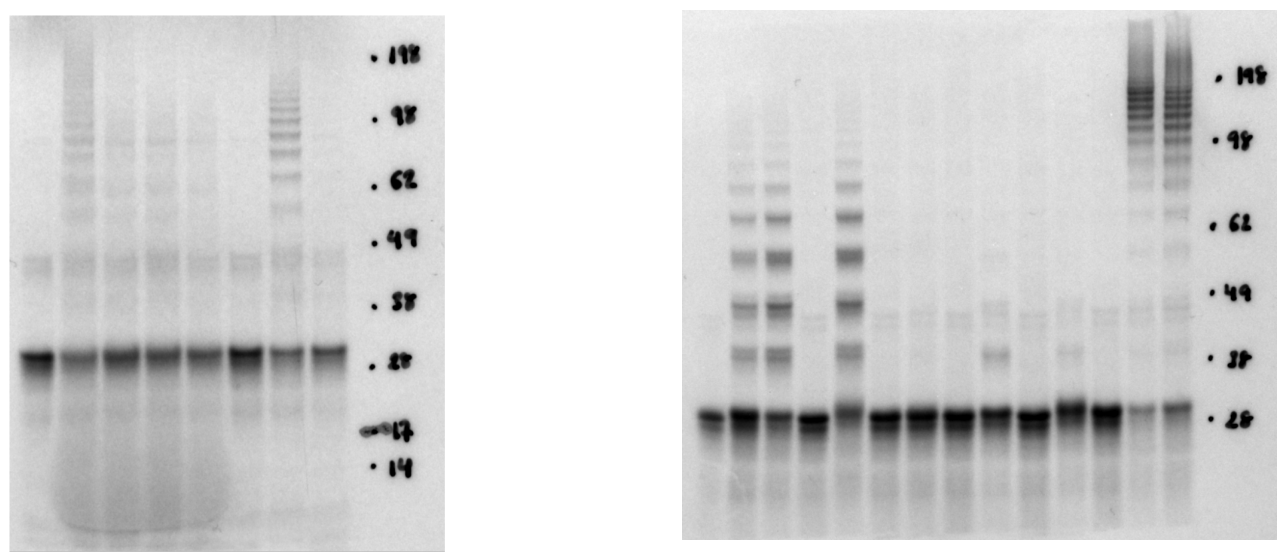

C

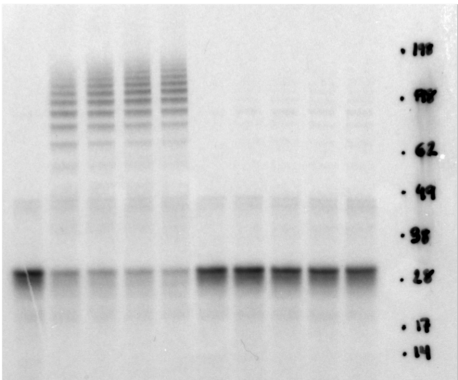

Supplement: fig1-figsupp1-data1 [file elife-100821-fig1-figsupp1-data1-v1.zip]

Figure 1-figure supplement 1  
Source data 2

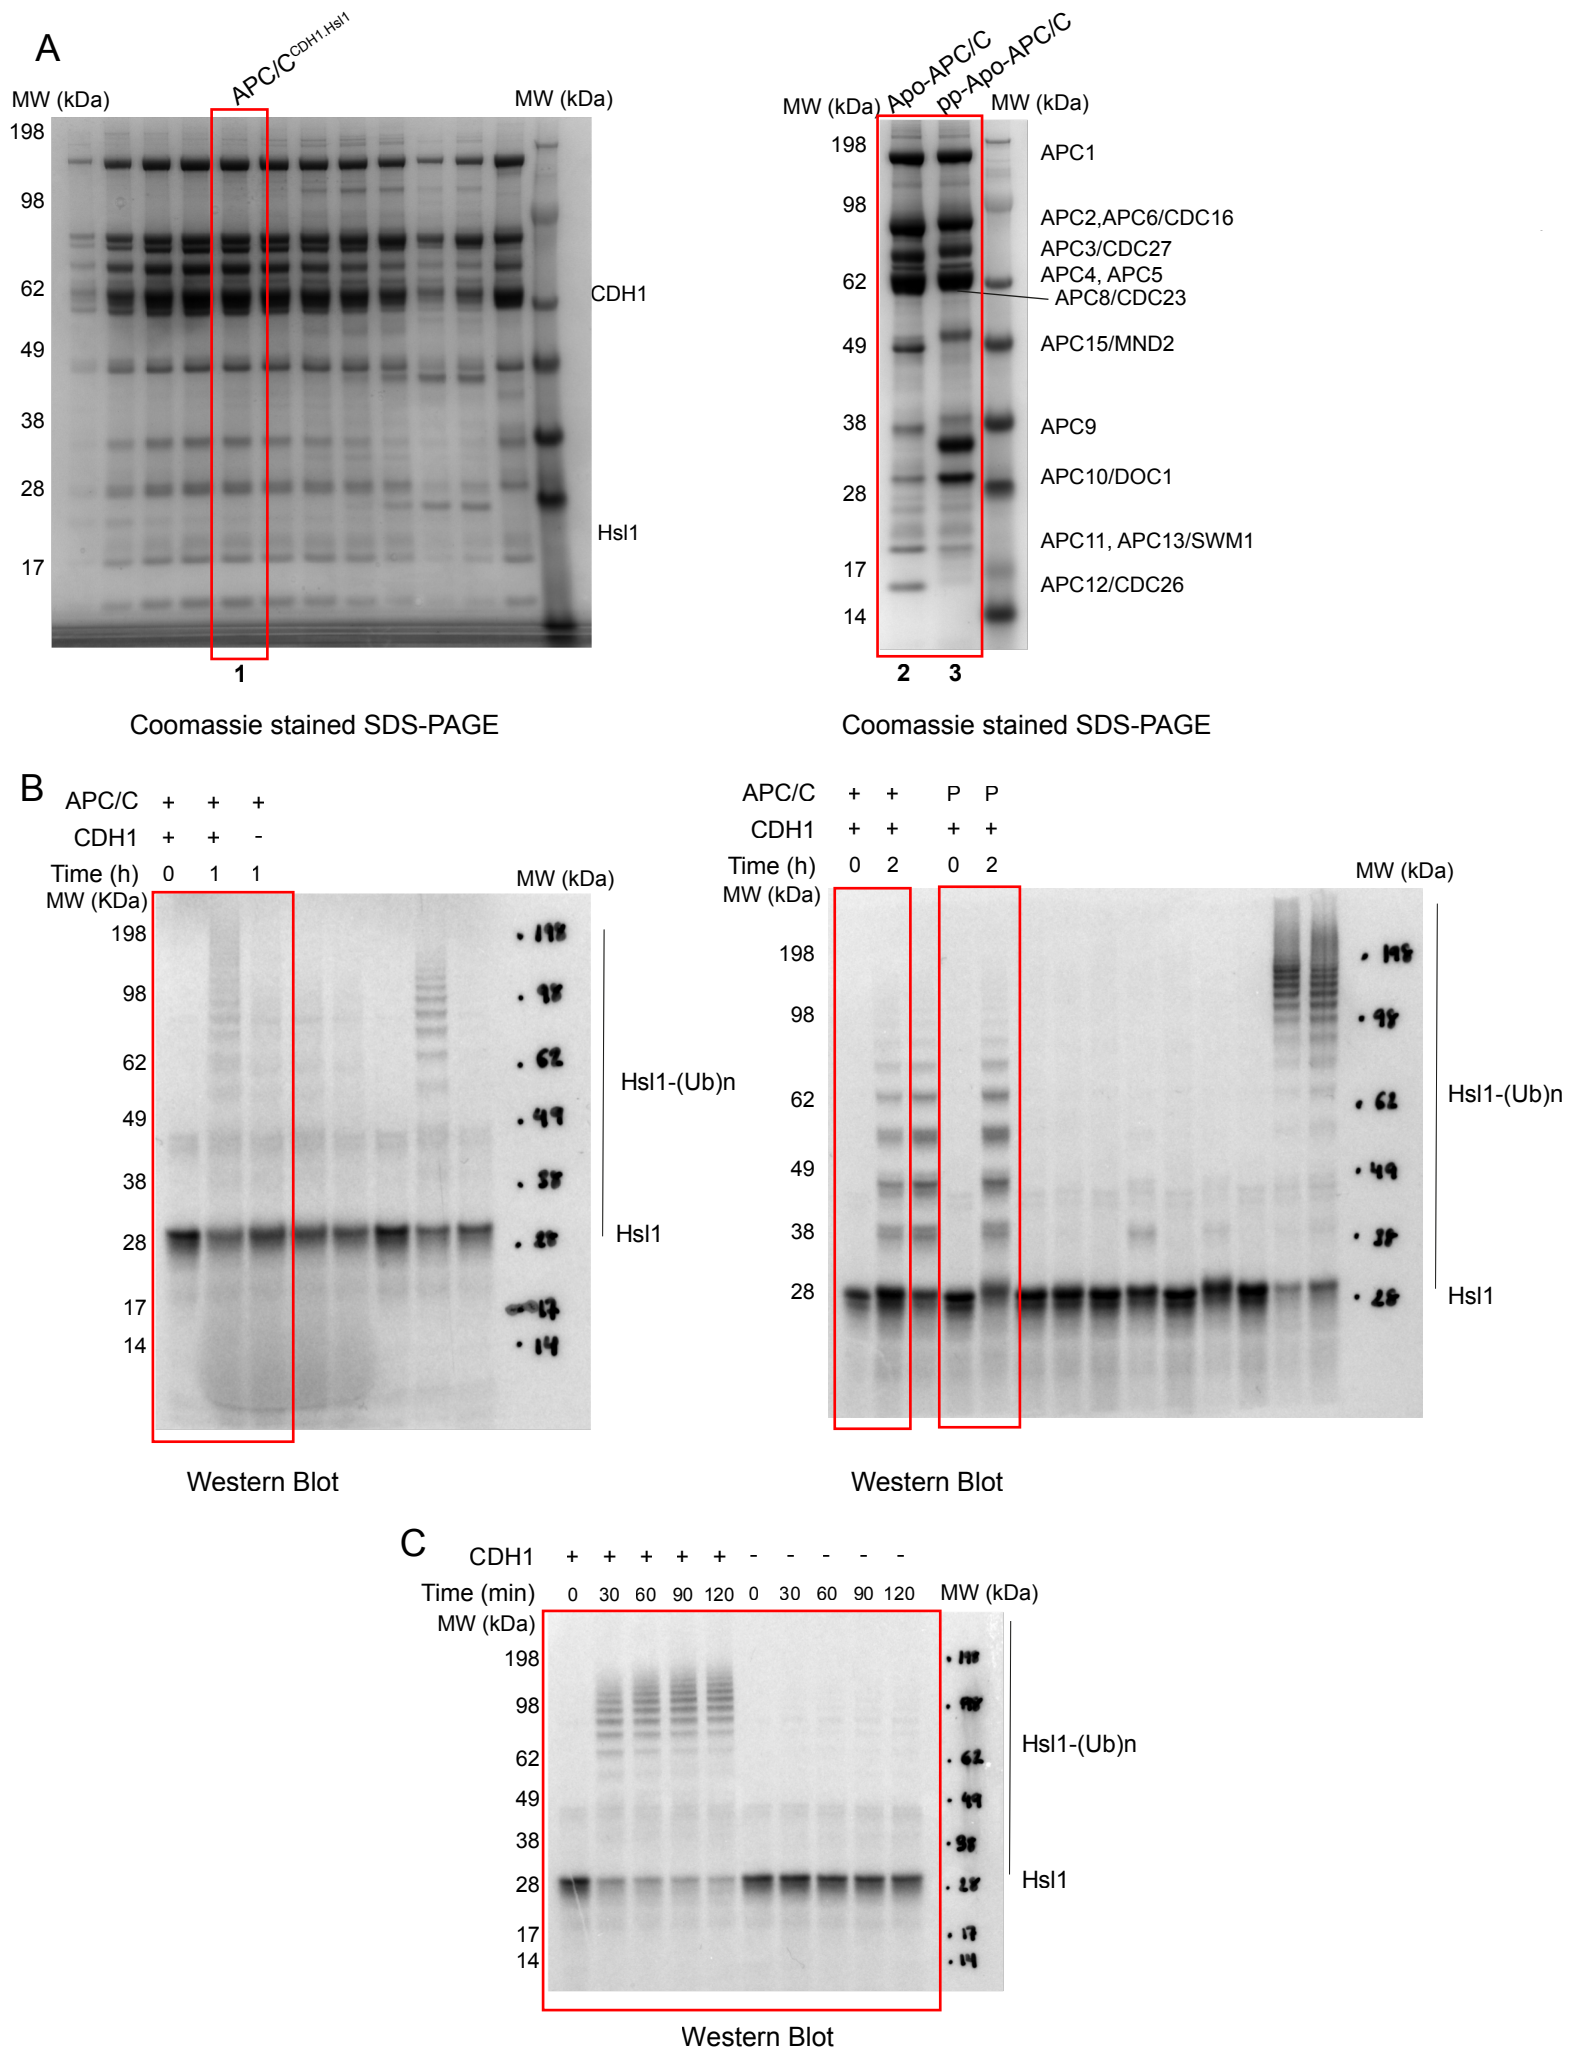

Supplement: fig1-figsupp1-data2 [file elife-100821-fig1-figsupp1-data2-v1.zip]
